# Supplementary material for: Pelvic Pyomyositis in Childhood: Clinical and Radiological Findings in a Tertiary Pediatric Center
Source: MDPI journal article supplement (doi:10.3390/children9050685), 2022-05-09
Supplement: s1 [file s1]

**Table S1.** Main demographic and clinical data of our 47 patients affected by pelvic pyomyositis.

| Characteristics                                              | Value          |
|--------------------------------------------------------------|----------------|
| Age at diagnosis, median (IQR) - <i>years</i>                | 7.5 (2.6-12.5) |
| Gender, n (%)                                                |                |
| Male                                                         | 31 (65.9)      |
| Nationality, n (%)                                           |                |
| Italian                                                      | 40 (85.1)      |
| Others                                                       | 7 (14.9)       |
| Time to diagnosis, median (IQR) - <i>days</i>                | 5 (3-9)        |
| LOS*, median (IQR) - <i>days</i>                             | 17 (10-26)     |
| Presenting symptoms                                          | Value          |
| Fever, n (%)                                                 | 18 (38.3)      |
| Pain, n (%)                                                  | 30 (63.8)      |
| Inability to weight bear and/or functional limitation, n (%) | 19 (40.4)      |
| Limp, n (%)                                                  | 9 (19.2)       |
| Skin alterations, n (%)                                      | 2 (4.2)        |
| Localized swelling, n (%)                                    | 5 (10.6)       |
| Irritability, n (%)                                          | 5 (10.6)       |
| Symptoms during the disease course                           | Value          |
| Fever, n (%)                                                 | 40 (85.1)      |
| Fever duration, median (IQR) - <i>days</i>                   | 4.5 (2-7.25)   |
| Sepsis, n (%)                                                | 5 (10.6)       |
| Inability to weight bear, n (%)                              | 40 (85.1)      |
| Hip pain, n (%)                                              | 33 (70.2)      |
| Gluteus pain, n (%)                                          | 16 (34)        |
| Thigh pain, n (%)                                            | 6 (12.8)       |
| Abdominal pain, n (%)                                        | 4 (8.5)        |
| Localized swelling, n (%)                                    | 11 (23.4)      |
| Skin alterations, n (%): hyperaemia                          | 6 (12.8)       |
| calor                                                        | 9 (19.1)       |
| skin lesions                                                 | 4 (8.5)        |

\*LOS: length of hospital stay.
