# Supplementary material for: Pelvic Pyomyositis in Childhood: Clinical and Radiological Findings in a Tertiary Pediatric Center
Source: MDPI journal article supplement (doi:10.3390/children9050685), 2022-05-09
Supplement: s1 [file s1]

**Table S2.** Main laboratory findings of our 47 patients affected by pelvic pyomyositis.

| Laboratory tests                                            | Value                                                                                                                                         |
|-------------------------------------------------------------|-----------------------------------------------------------------------------------------------------------------------------------------------|
| Serum CRP, mean (SD) - <i>mg/dL</i>                         | 10.3 (7.2)                                                                                                                                    |
| Serum PCT, mean (SD) - <i>ng/mL</i>                         | 3.5 (3.2)                                                                                                                                     |
| ESR, mean (SD) - <i>mm/h</i>                                | 68 (28.3)                                                                                                                                     |
| Serum WBC count, mean (SD) - <i>cells/<math>\mu</math>L</i> | 12,272 (5,767)                                                                                                                                |
| Hb, mean (SD) - <i>g/dL</i>                                 | 10.6 (2.4)                                                                                                                                    |
| Cultured microorganism                                      | No.                                                                                                                                           |
| Blood                                                       | 14 (10 <i>S aureus</i> , 1 <i>S pneumoniae</i> , 1 <i>S pyogenes</i> ,<br>1 <i>S agalatae</i> , 1 <i>P aeruginosa</i> and <i>E faecalis</i> ) |
| Drained pus                                                 | 4 (3 <i>S aureus</i> , 1 <i>P aeruginosa</i> and <i>E faecalis</i> )                                                                          |
| Synovial fluid                                              | 1 (1 <i>S aureus</i> )                                                                                                                        |
| Microorganism PCR                                           | No.                                                                                                                                           |
| Blood                                                       | 4 (2 <i>S pyogenes</i> , 2 <i>S aureus</i> )                                                                                                  |
| Drained pus                                                 | 5 (3 <i>S aureus</i> , 1 <i>S pneumoniae</i> , 1 <i>F necrophorum</i> )                                                                       |
| Synovial fluid                                              | 5 (2 <i>S aureus</i> , 1 <i>S aureus</i> and <i>S pyogenes</i> , 1 <i>S agalatae</i> ,<br>1 group Y N meningitidis)                           |

CRP: C-reactive protein; PCT: procalcitonin; ESR: erythrocyte sedimentation rate; WBC: white blood cells; Hb: haemoglobin; PCR: polymerase chain reaction.
