# Supplementary material for: Pelvic Pyomyositis in Childhood: Clinical and Radiological Findings in a Tertiary Pediatric Center
Source: MDPI journal article supplement (doi:10.3390/children9050685), 2022-05-09
Supplement: s1 [file s1]

**Table S3.** Microbiological findings in the 23 patients with identified causative pathogens.

| Case No. | Age (years) | Blood                      |            | Muscle drainage            |               | Synovial fluid |                        | Complications                                |
|----------|-------------|----------------------------|------------|----------------------------|---------------|----------------|------------------------|----------------------------------------------|
|          |             | Culture                    | PCR        | Culture                    | PCR           | Culture        | PCR                    |                                              |
| 1        | 12.70       | S aureus                   | -          | NP                         | NP            | NP             | NP                     |                                              |
| 2        | 0.04        | S pneumoniae               | -          | -                          | S pneumoniae  | NP             | NP                     | Sepsis, severe anaemia, compartment syndrome |
| 3        | 10.97       | S aureus                   | -          | NP                         | NP            | NP             | NP                     |                                              |
| 4        | 12.45       | S aureus                   | NP         | NP                         | NP            | -              | S aureus               |                                              |
| 5        | 8.43        | S aureus                   | -          | NP                         | NP            | -              | -                      |                                              |
| 6        | 2.05        | P aeruginosa<br>E faecalis | NP         | P aeruginosa<br>E faecalis | NP            | NP             | NP                     | Sepsis, soft tissues necrosis                |
| 7        | 13.99       | MRSA                       | S aureus   | NP                         | NP            | -              | -                      |                                              |
| 8        | 13.60       | S aureus                   | S aureus   | NP                         | NP            | S aureus       | S aureus               |                                              |
| 9        | 3.33        | S aureus                   | -          | NP                         | NP            | NP             | NP                     |                                              |
| 10       | 0.13        | S agalactiae               | -          | NP                         | NP            | NP             | NP                     | Severe anaemia                               |
| 11       | 16.28       | S aureus                   | -          | NP                         | NP            | NP             | NP                     | Sepsis                                       |
| 12       | 11.65       | S pyogenes                 | -          | NP                         | NP            | -              | -                      | Sepsis                                       |
| 13       | 12.19       | S aureus                   | -          | NP                         | NP            | NP             | NP                     |                                              |
| 14       | 13.32       | S aureus                   | -          | NP                         | NP            | NP             | NP                     |                                              |
| 15       | 4.81        | -                          | S pyogenes | NP                         | NP            | NP             | NP                     |                                              |
| 16       | 6.27        | -                          | S pyogenes | NP                         | NP            | -              | -                      |                                              |
| 17       | 0.02        | NP                         | NP         | MRSA PVL+                  | S aureus      | NP             | NP                     |                                              |
| 18       | 8.13        | -                          | -          | S aureus                   | S aureus      | NP             | NP                     |                                              |
| 19       | 16.18       | NP                         | NP         | S aureus                   | S aureus      | NP             | NP                     |                                              |
| 20       | 16.51       | -                          | -          | -                          | F necrophorum | -              | -                      | Septic shock, Lemierre's syndrome            |
| 21       | 8.97        | -                          | -          | NP                         | NP            | -              | group Y N meningitidis |                                              |
| 22       | 7.48        | -                          | -          | -                          | -             | -              | S aureus<br>S pyogenes |                                              |
| 23       | 0.17        | -                          | -          | -                          | NP            | -              | S agalactiae           | Femoral head dislocation                     |

PCR: polymerase chain reaction; -: negative; NP: not performed; MRSA: Methicillin-Resistant S aureus; PVL: Panton-Valentine leucocidin.
